# Supplementary material
Source: MDPI journal article supplement (https://www.mdpi.com/2073-4441/15/12/2286)
Supplement: s1 [file s1]

| Monitoring Station | Parameter                                   | CAS Number     | Threshold Values (Limiares) | count | mean  | std   | min   | 25%    | 50%    | 75%     | max    | Flag values (No. <LOD) |
|--------------------|---------------------------------------------|----------------|-----------------------------|-------|-------|-------|-------|--------|--------|---------|--------|------------------------|
| 29E_01             | Azoto amoniacal (mg/l NH4)                  | CAS_7664-41-7  | 0.5                         | 223   | 0.0   | 0.0   | 0.013 | 0.03   | 0.04   | 0.0455  | 0.49   | 121                    |
|                    | Cloreto (mg/l)                              | EEA_3142-01-6  | 250                         | 199   | 42.9  | 11.4  | 16    | 35     | 42.5   | 50.5    | 93     | 0                      |
|                    | Condutividade de laboratório a 20°C (µS/cm) | EEA_3152-01-0  | 2500                        | 222   | 230.8 | 50.2  | 101   | 199.25 | 231    | 261.75  | 424    | 0                      |
|                    | Nitrato (mg/l NO3)                          | CAS_16887-00-6 | 50                          | 223   | 1.1   | 0.8   | 0.1   | 0.65   | 1      | 1.09    | 6.42   | 105                    |
|                    | Sulfato (mg/l)                              | CAS_151-21-3   | 250                         | 11    | 18.7  | 13.7  | 0     | 9.3    | 21     | 25.75   | 41.2   | 0                      |
|                    | pH - lab. (-)                               | CAS_14797-55-8 | 5. 5-9                      | 223   | 7.2   | 0.3   | 6.45  | 7.1    | 7.2    | 7.34    | 8.73   | 0                      |
| 30E_04             | Azoto amoniacal (mg/l NH4)                  | CAS_7664-41-7  | 0.5                         | 141   | 0.0   | 0.0   | 0.007 | 0.026  | 0.04   | 0.04    | 0.12   | 105                    |
|                    | Cloreto (mg/l)                              | EEA_3142-01-6  | 250                         | 129   | 40.6  | 11.2  | 20.4  | 31     | 38     | 46.1    | 70.9   | 0                      |
|                    | Condutividade de laboratório a 20°C (µS/cm) | EEA_3152-01-0  | 2500                        | 141   | 244.0 | 54.1  | 125   | 208    | 235    | 276     | 431.4  | 0                      |
|                    | Nitrato (mg/l NO3)                          | CAS_16887-00-6 | 50                          | 141   | 1.9   | 1.4   | 0.2   | 1      | 1.25   | 2.71    | 6.6    | 50                     |
|                    | Sulfato (mg/l)                              | CAS_151-21-3   | 250                         | 8     | 18.6  | 18.2  | 0     | 0      | 21.55  | 26.4    | 52.1   | 0                      |
|                    | pH - lab. (-)                               | CAS_14797-55-8 | 5. 5-9                      | 142   | 7.4   | 0.3   | 6.6   | 7.2    | 7.39   | 7.545   | 8.69   | 0                      |
| 30F_50             | Azoto amoniacal (mg/l NH4)                  | CAS_7664-41-7  | 0.5                         | 19    | 0.0   | 0.0   | 0.039 | 0.039  | 0.04   | 0.04    | 0.066  | 16                     |
|                    | Cloreto (mg/l)                              | EEA_3142-01-6  | 250                         | 8     | 44.1  | 12.3  | 25    | 36.5   | 43     | 52.25   | 63     | 0                      |
|                    | Condutividade de laboratório a 20°C (µS/cm) | EEA_3152-01-0  | 2500                        | 19    | 306.1 | 70.4  | 174   | 269.5  | 290    | 350     | 463    | 0                      |
|                    | Nitrato (mg/l NO3)                          | CAS_16887-00-6 | 50                          | 19    | 3.3   | 1.9   | 1     | 1.75   | 3.4    | 4.7     | 7.6    | 3                      |
|                    | Sulfato (mg/l)                              | CAS_151-21-3   | 250                         | 0     | -     | -     | -     | -      | -      | -       | -      | -                      |
|                    | pH - lab. (-)                               | CAS_14797-55-8 | 5. 5-9                      | 19    | 7.8   | 0.2   | 7.4   | 7.7    | 7.9    | 7.9     | 8.4    | 0                      |
| 30F_51             | Azoto amoniacal (mg/l NH4)                  | CAS_7664-41-7  | 0.5                         | 20    | 0.0   | 0.0   | 0.039 | 0.039  | 0.039  | 0.04    | 0.085  | 19                     |
|                    | Cloreto (mg/l)                              | EEA_3142-01-6  | 250                         | 5     | 68.8  | 28.7  | 37    | 51     | 62     | 84      | 110    | 0                      |
|                    | Condutividade de laboratório a 20°C (µS/cm) | EEA_3152-01-0  | 2500                        | 20    | 373.3 | 88.7  | 183   | 312.5  | 368    | 435.75  | 530    | 0                      |
|                    | Nitrato (mg/l NO3)                          | CAS_16887-00-6 | 50                          | 20    | 1.0   | 0.1   | 1     | 1      | 1      | 1       | 1.5    | 18                     |
|                    | Sulfato (mg/l)                              | CAS_151-21-3   | 250                         | 0     | -     | -     | -     | -      | -      | -       | -      | -                      |
|                    | pH - lab. (-)                               | CAS_14797-55-8 | 5. 5-9                      | 20    | 7.8   | 0.3   | 7.3   | 7.7    | 7.8    | 7.8     | 8.6    | 0                      |
| 30F_52             | Azoto amoniacal (mg/l NH4)                  | CAS_7664-41-7  | 0.5                         | 26    | 0.0   | 0.0   | 0.039 | 0.039  | 0.039  | 0.04    | 0.082  | 22                     |
|                    | Cloreto (mg/l)                              | EEA_3142-01-6  | 250                         | 8     | 43.6  | 10.4  | 27    | 38.25  | 44     | 47.25   | 62     | 0                      |
|                    | Condutividade de laboratório a 20°C (µS/cm) | EEA_3152-01-0  | 2500                        | 26    | 318.0 | 66.6  | 186   | 277.75 | 304.5  | 360.75  | 462    | 0                      |
|                    | Nitrato (mg/l NO3)                          | CAS_16887-00-6 | 50                          | 26    | 2.9   | 1.8   | 1     | 1.2    | 2.45   | 4.25    | 6.8    | 6                      |
|                    | Sulfato (mg/l)                              | CAS_151-21-3   | 250                         | 0     | -     | -     | -     | -      | -      | -       | -      | -                      |
|                    | pH - lab. (-)                               | CAS_14797-55-8 | 5. 5-9                      | 26    | 7.8   | 0.4   | 7     | 7.7    | 7.8    | 8.1     | 8.7    | 0                      |
| 30G_08             | Azoto amoniacal (mg/l NH4)                  | CAS_7664-41-7  | 0.5                         | 37    | 0.2   | 0.3   | 0.026 | 0.04   | 0.07   | 0.26    | 1.66   | 11                     |
|                    | Cloreto (mg/l)                              | EEA_3142-01-6  | 250                         | 37    | 64.9  | 27.5  | 20    | 40.2   | 65.6   | 88      | 115    | 0                      |
|                    | Condutividade de laboratório a 20°C (µS/cm) | EEA_3152-01-0  | 2500                        | 38    | 773.5 | 278.1 | 240   | 519    | 808.85 | 1020.25 | 1146   | 0                      |
|                    | Nitrato (mg/l NO3)                          | CAS_16887-00-6 | 50                          | 37    | 11.7  | 6.8   | 3.8   | 6.65   | 10     | 15.3    | 37     | 0                      |
|                    | Sulfato (mg/l)                              | CAS_151-21-3   | 250                         | 5     | 106.1 | 49.5  | 34    | 93.7   | 113.6  | 118.1   | 171.3  | 0                      |
|                    | pH - lab. (-)                               | CAS_14797-55-8 | 5. 5-9                      | 38    | 7.9   | 0.4   | 6.7   | 7.7    | 7.915  | 8.0975  | 8.85   | 0                      |
| 30K_51             | Azoto amoniacal (mg/l NH4)                  | CAS_7664-41-7  | 0.5                         | 17    | 0.0   | 0.0   | 0.039 | 0.039  | 0.039  | 0.04    | 0.04   | 17                     |
|                    | Cloreto (mg/l)                              | EEA_3142-01-6  | 250                         | 5     | 42.4  | 11.0  | 28    | 35     | 43     | 53      | 53     | 0                      |
|                    | Condutividade de laboratório a 20°C (µS/cm) | EEA_3152-01-0  | 2500                        | 17    | 359.9 | 63.3  | 251   | 324    | 350    | 396     | 490    | 0                      |
|                    | Nitrato (mg/l NO3)                          | CAS_16887-00-6 | 50                          | 17    | 1.0   | 0.1   | 1     | 1      | 1      | 1       | 1.2    | 15                     |
|                    | Sulfato (mg/l)                              | CAS_151-21-3   | 250                         | 0     | -     | -     | -     | -      | -      | -       | -      | -                      |
|                    | pH - lab. (-)                               | CAS_14797-55-8 | 5. 5-9                      | 17    | 7.8   | 0.2   | 7.4   | 7.7    | 7.8    | 7.9     | 8.1    | 0                      |
| 31E_01             | Azoto amoniacal (mg/l NH4)                  | CAS_7664-41-7  | 0.5                         | 110   | 0.9   | 3.0   | 0.019 | 0.04   | 0.04   | 0.21075 | 20.319 | 61                     |
|                    | Cloreto (mg/l)                              | EEA_3142-01-6  | 250                         | 96    | 136.5 | 63.4  | 14    | 106    | 129.95 | 163.025 | 363.4  | 0                      |
|                    | Condutividade de laboratório a 20°C (µS/cm) | EEA_3152-01-0  | 2500                        | 111   | 832.7 | 306.1 | 149   | 659.5  | 840    | 1000.5  | 1687   | 0                      |
|                    | Nitrato (mg/l NO3)                          | CAS_16887-00-6 | 50                          | 111   | 4.0   | 2.5   | 0.09  | 2.45   | 3.5    | 5.115   | 16.68  | 9                      |
|                    | Sulfato (mg/l)                              | CAS_151-21-3   | 250                         | 9     | 39.7  | 35.8  | 0     | 0      | 41.2   | 67.1    | 101    | 0                      |
|                    | pH - lab. (-)                               | CAS_14797-55-8 | 5. 5-9                      | 111   | 7.9   | 0.5   | 6.94  | 7.6    | 7.9    | 8.3     | 8.88   | 0                      |
| 31H_02             | Azoto amoniacal (mg/l NH4)                  | CAS_7664-41-7  | 0.5                         | 188   | 0.0   | 0.0   | 0.003 | 0.026  | 0.039  | 0.04    | 0.32   | 126                    |
|                    | Cloreto (mg/l)                              | EEA_3142-01-6  | 250                         | 168   | 52.9  | 14.4  | 12    | 42.425 | 58     | 63.825  | 82     | 0                      |
|                    | Condutividade de laboratório a 20°C (µS/cm) | EEA_3152-01-0  | 2500                        | 190   | 675.2 | 139.2 | 169   | 603.25 | 738.5  | 771.5   | 964    | 0                      |
|                    | Nitrato (mg/l NO3)                          | CAS_16887-00-6 | 50                          | 189   | 4.3   | 1.7   | 0.46  | 3      | 4.4    | 5.6     | 8.6    | 1                      |
|                    | Sulfato (mg/l)                              | CAS_151-21-3   | 250                         | 9     | 37.2  | 7.2   | 30.9  | 33.1   | 35.9   | 37      | 55.1   | 0                      |
|                    | pH - lab. (-)                               | CAS_14797-55-8 | 5. 5-9                      | 190   | 7.6   | 0.4   | 5.05  | 7.48   | 7.6    | 7.8925  | 8.82   | 0                      |
| 31I_01             | Azoto amoniacal (mg/l NH4)                  | CAS_7664-41-7  | 0.5                         | 1     | 0.0   | -     | 0.039 | 0.039  | 0.039  | 0.039   | 0.039  | 1                      |
|                    | Cloreto (mg/l)                              | EEA_3142-01-6  | 250                         | 0     | -     | -     | -     | -      | -      | -       | -      | -                      |
|                    | Condutividade de laboratório a 20°C (µS/cm) | EEA_3152-01-0  | 2500                        | 1     | 830.0 | -     | 830   | 830    | 830    | 830     | 830    | 0                      |
|                    | Nitrato (mg/l NO3)                          | CAS_16887-00-6 | 50                          | 1     | 16.0  | -     | 16    | 16     | 16     | 16      | 16     | 0                      |
|                    | Sulfato (mg/l)                              | CAS_151-21-3   | 250                         | 0     | -     | -     | -     | -      | -      | -       | -      | -                      |
|                    | pH - lab. (-)                               | CAS_14797-55-8 | 5. 5-9                      | 1     | 8.0   | -     | 8     | 8      | 8      | 8       | 8      | 0                      |
| 31J_01             | Azoto amoniacal (mg/l NH4)                  | CAS_7664-41-7  | 0.5                         | 60    | 0.2   | 0.6   | 0.026 | 0.039  | 0.04   | 0.05    | 4.012  | 44                     |
|                    | Cloreto (mg/l)                              | EEA_3142-01-6  | 250                         | 55    | 40.8  | 13.7  | 13.7  | 36     | 38.4   | 45      | 115    | 0                      |
|                    | Condutividade de laboratório a 20°C (µS/cm) | EEA_3152-01-0  | 2500                        | 60    | 619.0 | 99.7  | 352   | 580    | 646.5  | 679.75  | 814    | 0                      |
|                    | Nitrato (mg/l NO3)                          | CAS_16887-00-6 | 50                          | 60    | 9.3   | 6.9   | 1     | 3.1    | 8.15   | 15      | 26     | 5                      |
|                    | Sulfato (mg/l)                              | CAS_151-21-3   | 250                         | 7     | 0.3   | 0.1   | 0.17  | 0.23   | 0.38   | 0.405   | 0.45   | 0                      |
|                    | pH - lab. (-)                               | CAS_14797-55-8 | 5. 5-9                      | 60    | 8.2   | 0.2   | 7.68  | 8.1    | 8.2    | 8.4     | 8.67   | 0                      |
| 31K_03             | Azoto amoniacal (mg/l NH4)                  | CAS_7664-41-7  | 0.5                         | 116   | 0.0   | 0.0   | 0.004 | 0.026  | 0.039  | 0.04    | 0.185  | 88                     |
|                    | Cloreto (mg/l)                              | EEA_3142-01-6  | 250                         | 107   | 40.8  | 14.0  | 17    | 30.55  | 39     | 48      | 82     | 0                      |
|                    | Condutividade de laboratório a 20°C (µS/cm) | EEA_3152-01-0  | 2500                        | 116   | 334.4 | 96.4  | 117   | 271.25 | 344.5  | 399.25  | 564    | 0                      |
|                    | Nitrato (mg/l NO3)                          | CAS_16887-00-6 | 50                          | 116   | 1.0   | 1.1   | 0.01  | 0.3    | 1      | 1       | 7.4    | 72                     |
|                    | Sulfato (mg/l)                              | CAS_151-21-3   | 250                         | 5     | 26.2  | 10.1  | 18.6  | 19.5   | 21.3   | 28.6    | 42.9   | 0                      |
|                    | pH - lab. (-)                               | CAS_14797-55-8 | 5. 5-9                      | 117   | 7.9   | 0.3   | 7.1   | 7.7    | 7.9    | 8       | 8.4    | 0                      |
| 31K_50             | Azoto amoniacal (mg/l NH4)                  | CAS_7664-41-7  | 0.5                         | 9     | 0.0   | 0.0   | 0.039 | 0.039  | 0.04   | 0.04    | 0.04   | 9                      |
|                    | Cloreto (mg/l)                              | EEA_3142-01-6  | 250                         | 5     | 36.6  | 3.8   | 31    | 35     | 37     | 39      | 41     | 0                      |
|                    | Condutividade de laboratório a 20°C (µS/cm) | EEA_3152-01-0  | 2500                        | 9     | 693.2 | 54.8  | 600   | 660    | 700    | 740     | 750    | 0                      |
|                    | Nitrato (mg/l NO3)                          | CAS_16887-00-6 | 50                          | 9     | 4.6   | 1.5   | 3.3   | 3.6    | 4      | 4.9     | 7.8    | 0                      |
|                    | Sulfato (mg/l)                              | CAS_151-21-3   | 250                         | 0     | -     | -     | -     | -      | -      | -       | -      | -                      |
|                    | pH - lab. (-)                               | CAS_14797-55-8 | 5. 5-9                      | 9     | 7.4   | 0.3   | 7.1   | 7.2    | 7.4    | 7.5     | 7.8    | 0                      |
| 31L_50             | Azoto amoniacal (mg/l NH4)                  | CAS_7664-41-7  | 0.5                         | 15    | 0.0   | 0.0   | 0.039 | 0.039  | 0.039  | 0.039   | 0.04   | 15                     |
|                    | Cloreto (mg/l)                              | EEA_3142-01-6  | 250                         | 3     | 57.0  | 17.7  | 38    | 49     | 60     | 66.5    | 73     | 0                      |
|                    | Condutividade de laboratório a 20°C (µS/cm) | EEA_3152-01-0  | 2500                        | 15    | 472.7 | 103.4 | 269   | 411.5  | 469    | 534     | 640    | 0                      |
|                    | Nitrato (mg/l NO3)                          | CAS_16887-00-6 | 50                          | 15    | 1.4   | 1.4   | 1     | 1      | 1      | 1       | 6.5    | 14                     |
|                    | Sulfato (mg/l)                              | CAS_151-21-3   | 250                         | 0     | -     | -     | -     | -      | -      | -       | -      | -                      |
|                    | pH - lab. (-)                               | CAS_14797-55-8 | 5. 5-9                      | 15    | 7.7   | 0.3   | 7     | 7.5    | 7.7    | 7.85    | 8.1    | 0                      |
