# Supplementary material
Source: MDPI journal article supplement (https://www.mdpi.com/2073-4441/15/12/2286)
Supplement: s1 [file s1]

Table S1: Aquifer properties, design capacity ( $Q_{MAR}$ ), and infrastructure requirements for MAR

| Aquifer     | Method to estimate $Q_{MAR}$ | Transmissivity T (m <sup>2</sup> /d)          | Storativity, S (-) | Maximum continuous recharge duration, t (days) | Maximum head change at borehole ( $\Delta h$ max, m) | MAR recharge method | No. | $Q_{MAR}$ (rounded to nearest 1000 m <sup>3</sup> /d) |
|-------------|------------------------------|-----------------------------------------------|--------------------|------------------------------------------------|------------------------------------------------------|---------------------|-----|-------------------------------------------------------|
| M2          | Theis                        | 196                                           | 0.075              | 60                                             | 39.77                                                | BH                  | 4   | 23000                                                 |
| M3          | Theis                        | 230                                           | 0.001              | 60                                             | 59.52                                                | BH                  | 6   | 49000                                                 |
| M4          | Theis                        | 250                                           | 0.001              | 60                                             | 64.38                                                | BH                  | 2   | 19000                                                 |
| M6          | Theis                        | 2000                                          | 0.001              | 60                                             | 10                                                   | BH                  | 4   | 43000                                                 |
| M7          | Theis                        | 1125                                          | 2.40E-04           | 60                                             | 16.83                                                | BH                  | 4   | 40000                                                 |
| M13         | Theis                        | 500                                           | 1.00E-03           | 60                                             | 10                                                   | BH                  | 5   | 14000                                                 |
| M14         | Theis                        | 500                                           | 0.001              | 60                                             | 16.7                                                 | BH                  | 4   | 19000                                                 |
| M15         | Measured                     | Based on Rio Seco MARSOL results              |                    |                                                |                                                      | IB                  | 5   | 63000                                                 |
| M18         | Modelled                     | Based on Standen et. al., 2022                |                    |                                                |                                                      | IB                  | 1   | 13000                                                 |
| M19         | Measured                     | Based on pumping tests in Costa et. al., 2021 |                    |                                                |                                                      | Poços               | 10  | 25000                                                 |
| East of M15 | Extrapolated                 | Based on Rio Seco MARSOL results              |                    |                                                |                                                      | Poços               | 15  | 38000                                                 |
| BA          | Extrapolated                 | Based on Rio Seco MARSOL results              |                    |                                                |                                                      | IB                  | 5   | 63000                                                 |
