# Supplementary material
Source: MDPI journal article supplement (https://www.mdpi.com/2073-4441/15/12/2286)
Supplement: s1 [file s1]

Table S4 Surface water metal concentrations compared to groundwater threshold values

| Monitoring Station | Parameter (Portuguese)    | Parameter (English)      | CAS Number    | Threshold Values (Limiares) | count | mean       | std        | min     | 25%      | 50%      | 75%      | max      | Flag values (No. <LOD) |
|--------------------|---------------------------|--------------------------|---------------|-----------------------------|-------|------------|------------|---------|----------|----------|----------|----------|------------------------|
| 29E/01             | Arsénio total (mg/l)      | Arsenic total (mg/l)     | CAS_7440-38-2 | 0.01                        | 8     | 0.0008875  | 0.00081317 | 0.0006  | 0.0006   | 0.0006   | 0.0006   | 0.0029   | 7                      |
|                    | Chumbo total (mg/l)       | Lead total (mg/l)        | CAS_7439-92-1 | 0.01                        | 10    | 0.0028     | 0.00042164 | 0.002   | 0.003    | 0.003    | 0.003    | 0.003    | 8                      |
|                    | Cádmio total (mg/l)       | Cadmium total (mg/l)     | CAS_7440-43-9 | 0.005                       | 10    | 0.00089    | 0.00024244 | 0.0003  | 0.001    | 0.001    | 0.001    | 0.001    | 8                      |
|                    | Mercúrio total (mg/l)     | Mercury total (mg/l)     | CAS_7439-97-6 | 0.001                       | 10    | 0.00022    | 4.2164E-05 | 0.0002  | 0.0002   | 0.0002   | 0.0002   | 0.0003   | 10                     |
| 30E/04             | Arsénio total (mg/l)      | Arsenic total (mg/l)     | CAS_7440-38-2 | 0.01                        | 7     | 0.00086    | 0.00068    | 0.0006  | 0.0006   | 0.0006   | 0.0006   | 0.0024   | 6                      |
|                    | Chumbo total (mg/l)       | Lead total (mg/l)        | CAS_7439-92-1 | 0.01                        | 9     | 0.00278    | 0.00044    | 0.002   | 0.003    | 0.003    | 0.003    | 0.003    | 7                      |
|                    | Cádmio total (mg/l)       | Cadmium total (mg/l)     | CAS_7440-43-9 | 0.005                       | 9     | 0.00088    | 0.00025    | 0.0003  | 0.001    | 0.001    | 0.001    | 0.001    | 7                      |
|                    | Mercúrio total (mg/l)     | Mercury total (mg/l)     | CAS_7439-97-6 | 0.001                       | 9     | 0.00022    | 0.00004    | 0.0002  | 0.0002   | 0.0002   | 0.0002   | 0.0003   | 9                      |
| 30F/50             | Arsénio dissolved (mg/l)  | Arsenic dissolved (mg/l) | CAS_7440-38-2 | 0.01                        | 2     | 0.001      | -          | 0.001   | 0.001    | 0.001    | 0.001    | 0.001    | 1                      |
|                    | Chumbo dissolved (mg/l)   | Lead dissolved (mg/L)    | CAS_7439-92-1 | 0.01                        | 3     | 0.001      | -          | 0.001   | 0.001    | 0.001    | 0.001    | 0.001    | 3                      |
|                    | Cádmio dissolved (mg/l)   | Cadmium dissolved (mg/l) | CAS_7440-43-9 | 0.005                       | 3     | 0.00008    | 0.00005    | 0.00005 | 0.00005  | 0.00005  | 0.00009  | 0.00013  | 2                      |
| 30F/52             | Arsénio dissolved (mg/l)  | Arsenic dissolved (mg/l) | CAS_7440-38-2 | 0.01                        | 12    | 0.00104167 | 0.00014434 | 0.001   | 0.001    | 0.001    | 0.001    | 0.0015   | 11                     |
|                    | Chumbo dissolved (mg/l)   | Lead dissolved (mg/L)    | CAS_7439-92-1 | 0.01                        | 12    | 0.001      | -          | 0.001   | 0.001    | 0.001    | 0.001    | 0.001    | 12                     |
|                    | Cádmio dissolved (mg/l)   | Cadmium dissolved (mg/l) | CAS_7440-43-9 | 0.005                       | 11    | 0.00009    | 0.00008    | 0.00005 | 0.00005  | 0.00005  | 0.00005  | 0.00025  | 11                     |
| 30G/08             | Arsénio total (mg/l)      | Arsenic total (mg/l)     | CAS_7440-38-2 | 0.01                        | 3     | 0.0009     | 0.0002     | 0.0006  | 0.0008   | 0.001    | 0.001    | 0.001    | 2                      |
|                    | Chumbo total (mg/l)       | Lead total (mg/l)        | CAS_7439-92-1 | 0.01                        | 4     | 0.0028     | 0.0005     | 0.002   | 0.00275  | 0.003    | 0.003    | 0.003    | 3                      |
|                    | Cádmio total (mg/l)       | Cadmium total (mg/l)     | CAS_7440-43-9 | 0.005                       | 5     | 0.0007     | 0.0004     | 0.0003  | 0.0003   | 0.001    | 0.001    | 0.001    | 5                      |
|                    | Mercúrio total (mg/l)     | Mercury total (mg/l)     | CAS_7439-97-6 | 0.001                       | 5     | 0.0004     | 0.0002     | 0.0002  | 0.0003   | 0.0003   | 0.0004   | 0.0008   | 5                      |
| 30K/51             | Arsénio dissolved (mg/l)  | Arsenic dissolved (mg/l) | CAS_7440-38-2 | 0.01                        | 1     | 0.001      | -          | 0.001   | 0.001    | 0.001    | 0.001    | 0.001    | 1                      |
|                    | Chumbo dissolved (mg/l)   | Lead dissolved (mg/L)    | CAS_7439-92-1 | 0.01                        | 8     | 0.001      | 0.0        | 0.001   | 0.001    | 0.001    | 0.001    | 0.001    | 8                      |
|                    | Cádmio dissolved (mg/l)   | Cadmium total (mg/l)     | CAS_7440-43-9 | 0.005                       | 7     | 0.000164   | 0.000107   | 0.00005 | 0.00005  | 0.00025  | 0.00025  | 0.00025  | 7                      |
|                    | Mercúrio dissolved (mg/l) | Mercury dissolved (mg/l) | CAS_7439-97-6 | 0.001                       | 2     | 0.000012   | 0.000003   | 0.00001 | 0.000011 | 0.000012 | 0.000013 | 0.000014 | 1                      |
| 31E/01             | Arsénio total (mg/l)      | Arsenic total (mg/l)     | CAS_7440-38-2 | 0.01                        | 25    | 0.0011     | 0.0021     | 0.00019 | 0.00019  | 0.00019  | 0.001    | 0.01     | 19                     |
|                    | Chumbo total (mg/l)       | Lead total (mg/l)        | CAS_7439-92-1 | 0.01                        | 27    | 0.0024     | 0.0012     | 0.002   | 0.002    | 0.002    | 0.002    | 0.008    | 23                     |
|                    | Cádmio total (mg/l)       | Cadmium total (mg/l)     | CAS_7440-43-9 | 0.005                       | 27    | 0.0004     | 0.0004     | 0.00013 | 0.00013  | 0.00013  | 0.00063  | 0.001    | 24                     |
|                    | Mercúrio total (mg/l)     | Mercury total (mg/l)     | CAS_7439-97-6 | 0.001                       | 28    | 0.0001     | 0.0001     | 0.0001  | 0.0001   | 0.0001   | 0.0002   | 0.0003   | 28                     |
| 31H/02             | Arsénio total (mg/l)      | Arsenic total (mg/l)     | CAS_7440-38-2 | 0.01                        | 7     | 0.0007     | 0.0002     | 0.0006  | 0.0006   | 0.0006   | 0.0006   | 0.001    | 7                      |
|                    | Chumbo total (mg/l)       | Lead total (mg/l)        | CAS_7439-92-1 | 0.01                        | 12    | 0.0034     | 0.0031     | 0.002   | 0.002    | 0.003    | 0.003    | 0.013    | 6                      |
|                    | Cádmio total (mg/l)       | Cadmium total (mg/l)     | CAS_7440-43-9 | 0.005                       | 12    | 0.0007     | 0.0003     | 0.0003  | 0.0003   | 0.001    | 0.001    | 0.001    | 12                     |
|                    | Mercúrio total (mg/l)     | Mercury total (mg/l)     | CAS_7439-97-6 | 0.001                       | 12    | 0.0003     | 0.0002     | 0.0002  | 0.0002   | 0.00025  | 0.0003   | 0.0008   | 12                     |
| 31I/01             | Arsénio dissolved (mg/l)  | Arsenic dissolved (mg/l) | CAS_7440-38-2 | 0.01                        | 1     | 0.001      | -          | 0.001   | 0.001    | 0.001    | 0.001    | 0.001    | 1                      |
|                    | Chumbo dissolved (mg/l)   | Lead dissolved (mg/L)    | CAS_7439-92-1 | 0.01                        | 1     | 0.001      | -          | 0.001   | 0.001    | 0.001    | 0.001    | 0.001    | 1                      |
|                    | Cádmio dissolved (mg/l)   | Cadmium total (mg/l)     | CAS_7440-43-9 | 0.005                       | 1     | 0.0001     | -          | 0.00005 | 0.00005  | 0.00005  | 0.00005  | 0.00005  | 0                      |
| 31J/01             | Arsénio total (mg/l)      | Arsenic total (mg/l)     | CAS_7440-38-2 | 0.01                        | 5     | 0.0007     | 0.0003     | 0.0006  | 0.0006   | 0.0006   | 0.0006   | 0.0013   | 4                      |
|                    | Chumbo total (mg/l)       | Lead total (mg/l)        | CAS_7439-92-1 | 0.01                        | 5     | 0.0038     | 0.0018     | 0.003   | 0.003    | 0.003    | 0.003    | 0.007    | 4                      |
|                    | Cádmio total (mg/l)       | Cadmium total (mg/l)     | CAS_7440-43-9 | 0.005                       | 5     | 0.0010     | -          | 0.001   | 0.001    | 0.001    | 0.001    | 0.001    | 5                      |
|                    | Mercúrio total (mg/l)     | Mercury total (mg/l)     | CAS_7439-97-6 | 0.001                       | 5     | 0.0002     | -          | 0.0002  | 0.0002   | 0.0002   | 0.0002   | 0.0002   | 5                      |
| 31K/03             | Arsénio total (mg/l)      | Arsenic total (mg/l)     | CAS_7440-38-2 | 0.01                        | 6     | 0.0007     | 0.00016    | 0.0006  | 0.0006   | 0.0006   | 0.0006   | 0.001    | 6                      |
|                    | Chumbo total (mg/l)       | Lead total (mg/l)        | CAS_7439-92-1 | 0.01                        | 8     | 0.0028     | 0.00071    | 0.002   | 0.002    | 0.003    | 0.003    | 0.004    | 4                      |
|                    | Cádmio total (mg/l)       | Cadmium total (mg/l)     | CAS_7440-43-9 | 0.005                       | 9     | 0.0007     | 0.00046    | 0       | 0.0003   | 0.001    | 0.001    | 0.001    | 6                      |
|                    | Mercúrio total (mg/l)     | Mercury total (mg/l)     | CAS_7439-97-6 | 0.001                       | 9     | 0.0002     | 0.00005    | 0.0002  | 0.0002   | 0.0002   | 0.0003   | 0.0003   | 9                      |
| 31K/50             | Arsénio dissolved (mg/l)  | Arsenic dissolved (mg/l) | CAS_7440-38-2 | 0.01                        | 1     | 0.0012     | -          | 0.0012  | 0.0012   | 0.0012   | 0.0012   | 0.0012   | 0                      |
|                    | Chumbo dissolved (mg/l)   | Lead dissolved (mg/L)    | CAS_7439-92-1 | 0.01                        | 3     | 0.0010     | 0          | 0.001   | 0.001    | 0.001    | 0.001    | 0.001    | 3                      |
|                    | Cádmio dissolved (mg/l)   | Cadmium dissolved (mg/l) | CAS_7440-43-9 | 0.005                       | 3     | 0.0001     | 0.000023   | 0.00005 | 0.00005  | 0.00005  | 0.00007  | 0.00009  | 2                      |
| 31L/50             | Chumbo dissolved (mg/l)   | Lead dissolved (mg/L)    | CAS_7439-92-1 | 0.01                        | 3     | 0.0        | 0          | 0.001   | 0.001    | 0.001    | 0.001    | 0.001    | 3                      |
|                    | Cádmio dissolved (mg/l)   | Cadmium dissolved (mg/l) | CAS_7440-43-9 | 0.005                       | 2     | 0.0        | 0          | 0.00025 | 0.00025  | 0.00025  | 0.00025  | 0.00025  | 2                      |
