# Supplementary material
Source: MDPI journal article supplement (https://www.mdpi.com/2073-4441/15/12/2286)
Supplement: s1 [file s1]

Table S2 Water Quality Sampling Locations

| Surface water quality monitoring reference | Name                 | River                   | Surface water catchment Reference | Sampling start date | Sampling end date |
|--------------------------------------------|----------------------|-------------------------|-----------------------------------|---------------------|-------------------|
| 31E/01                                     | Bensafrim            | Ribeira de Bensafrim    | 1*                                | 1995                | 2020              |
| 30F/51                                     | Canafechal           | Ribeira de Arão         | 3                                 | 2009                | 2020              |
| 30F/52                                     | Porto Lagos          | Ribeira de Boina        | 4                                 | 2009                | 2020              |
| 30F/50                                     | Rasmalho             | Ribeira de Boina        | 4                                 | 2009                | 2020              |
| 30G/08                                     | Ponte Mesquita       | Ribeira da Alcantarilha | 5                                 | 1995                | 2014              |
| 31H/02                                     | Ponte Rodoviária     | Ribeira da Quarteira    | 6                                 | 1995                | 2019              |
| 31I/01                                     | S.Lourenço / Areeiro | Ribeira da São Lourenço | 7                                 | 2017                | 2017              |
| 31J/01                                     | Coiro Burra          | Rio Seco                | 8                                 | 2001                | 2018              |
| 31K/50                                     | Ponte Asseca         | Rio Sequa ou Gilão      | 9                                 | 2009                | 2018              |
| 31K/03                                     | Bodega               | Ribeira de Alportel     | 10                                | 1995                | 2020              |
| 30K/51                                     | Carcavaia            | Ribeira de Alportel     | 10                                | 2009                | 2019              |
| 31L/50                                     | Cerro Almargem       | Ribeira de Almargem     | 11                                | 2009                | 2020              |
| 29E/01                                     | Furadoiro-Odeceixe   | Ribeira da Seixe        | 13                                | 1995                | 2019              |
| 30E/04                                     | Ponte Pereiro        | Ribeira de Aljezur      | 12                                | 1997                | 2019              |

\*Located just upstream of confluence with catchment 2.

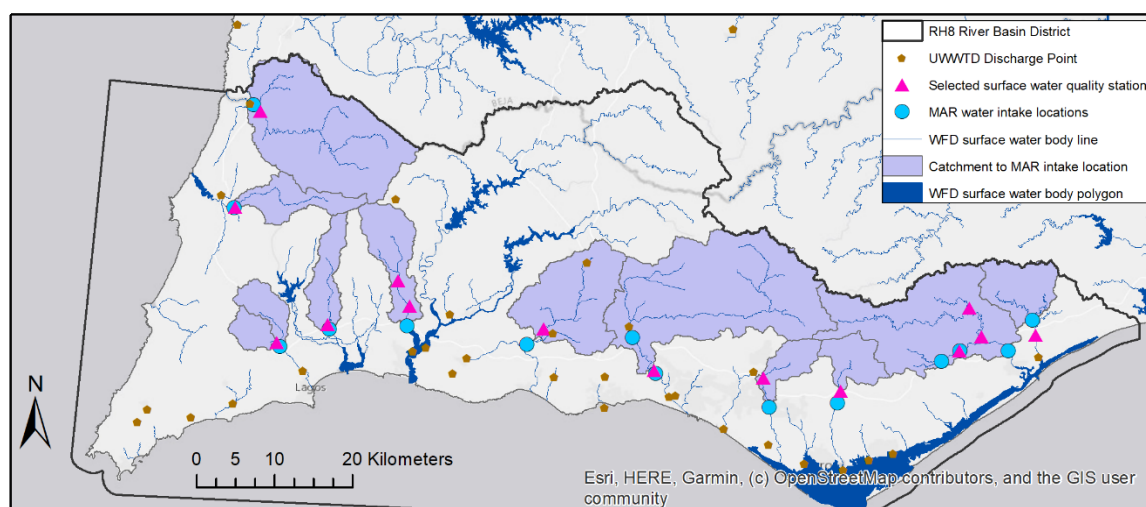

Figure S1 Location of selected surface water quality monitoring stations for water quality assessment, compared to proposed surface water abstraction locations for MAR, and existing Urban Waste Water Treatment Directive (UWWTD) discharge point locations.
