# Supplementary material
Source: MDPI journal article supplement (https://www.mdpi.com/2073-4441/15/12/2286)
Supplement: s1 [file s1]

Table S6 – Summary of pesticide analyses

| Ref.   | Name                 | Catchment Reference | Number of analytes | Number of samples (analytes*count) | Number of values > LOD | Analytes exceeding LOD    | Concentration (µg/l) |
|--------|----------------------|---------------------|--------------------|------------------------------------|------------------------|---------------------------|----------------------|
| 29E/01 | Furadoiro-Odeceixe   | 13                  | 41                 | 148                                | 1                      | Tributyl phosphate (µg/l) | <b>0.19</b>          |
| 30E/04 | Ponte Pereiro        | 12                  | 41                 | 112                                | 0                      | -                         | -                    |
| 31E/01 | Bensafrim            | 1                   | 70                 | 842                                | 37                     | 2,4,5-T (µg/l)            | <b>0.16-0.25</b>     |
|        |                      |                     |                    |                                    |                        | 2,4-D (µg/l)              | <b>0.15-1.35</b>     |
|        |                      |                     |                    |                                    |                        | Atrazine (µg/l)           | 0.03                 |
|        |                      |                     |                    |                                    |                        | Bentazone (µg/l)          | <b>0.12</b>          |
|        |                      |                     |                    |                                    |                        | Dicloroprop (µg/l)        | <b>0.12</b>          |
|        |                      |                     |                    |                                    |                        | Tributyl phosphate (µg/l) | 0.022- <b>2.45</b>   |
|        |                      |                     |                    |                                    |                        | DEHP (µg/l)               | <b>3</b>             |
|        |                      |                     |                    |                                    |                        | MCPA (µg/l)               | <b>0.21-0.73</b>     |
|        |                      |                     |                    |                                    |                        | Mecoprop (µg/l)           | <b>0.15-0.22</b>     |
|        |                      |                     |                    |                                    |                        | Simazine (µg/l)           | <b>0.03-0.56</b>     |
| 30F/51 | Canafechal           | 3                   | 0                  | 0                                  | -                      | -                         | -                    |
| 30F/52 | Porto Lagos          | 4                   | 28                 | 197                                | 1                      | Tributyl phosphate (µg/l) | <b>0.15</b>          |
| 30F/50 | Rasmalho             | 4                   | 24                 | 48                                 | 1                      | Tributyl phosphate (µg/l) | <b>0.11</b>          |
| 30G/08 | Ponte Mesquita       | 5                   | 24                 | 49                                 | 0                      | -                         | -                    |
| 31H/02 | Ponte Rodoviária     | 6                   | 43                 | 299                                | 0                      | -                         | -                    |
| 31I/01 | S.Lourenço / Areeiro | 7                   | 8                  | 8                                  | 0                      | -                         | -                    |
| 31J/01 | Coiro Burra          | 8                   | 24                 | 61                                 | 0                      | -                         | -                    |
| 31K/50 | Ponte Asseca         | 9                   | 24                 | 53                                 | 0                      | -                         | -                    |
| 31K/03 | Bodega               | 10                  | 24                 | 74                                 | 0                      | -                         | -                    |
| 30K/51 | Carcavaia            | 10                  | 25                 | 102                                | 2                      | Tributyl phosphate (µg/l) | <b>0.21</b>          |
|        |                      |                     |                    |                                    |                        | Imidacloprid (µg/l)       | 0.093                |
| 31L/50 | Cerro Almargem       | 11                  | 0                  | 0                                  | -                      | -                         | -                    |
