# Supplementary material
Source: MDPI journal article supplement (https://www.mdpi.com/2073-4441/15/12/2286)
Supplement: s1 [file s1]

Table S3 Surface Water Exceedances of Groundwater Threshold Values

| Parameter (Portuguese)                    | Parameter (English)                       | CAS Number     | Threshold Values (Limiares) | Quality standards (Norma de qualidade) | 29E/01         |          |                                                    | 30E/04         |          |                                                    | 30F/50         |          |                                                    |
|-------------------------------------------|-------------------------------------------|----------------|-----------------------------|----------------------------------------|----------------|----------|----------------------------------------------------|----------------|----------|----------------------------------------------------|----------------|----------|----------------------------------------------------|
|                                           |                                           |                |                             |                                        | No. of samples | No. <LOD | No. exceeding threshold values / Quality standards | No. of samples | No. <LOD | No. exceeding threshold values / Quality standards | No. of samples | No. <LOD | No. exceeding threshold values / Quality standards |
| Azoto Amoniacal (mg/L)                    | Ammoniacal Nitrogen (mg/L)                | CAS_7664-41-7  | 0.5                         | -                                      | 223            | 121      | 0                                                  | 141            | 105      | 0                                                  | 19             | 16       | 0                                                  |
| Condutividade (µS/cm)                     | Electrical conductivity (µS/cm)           | EEA_3142-01-6  | 2500                        |                                        | 222            | 0        | 0                                                  | 141            | 0        | 0                                                  | 19             | 0        | 0                                                  |
| pH                                        | pH                                        | EEA_3152-01-0  | 5. 5-9                      |                                        | 223            | 0        | 0                                                  | 142            | 0        | 0                                                  | 19             | 0        | 0                                                  |
| Arsénio (mg/L)                            | Arsenic (mg/L)                            | CAS_7440-38-2  | 0.01                        | -                                      | 14             | 11       | 0                                                  | 8              | 7        | 0                                                  | 2              | 1        | 0                                                  |
| Cádmio (mg/L)                             | Cadmium (mg/L)                            | CAS_7440-43-9  | 0.005                       | -                                      | 40             | 37       | 0                                                  | 9              | 7        | 0                                                  | 3              | 2        | 0                                                  |
| Chumbo (mg/L)                             | Lead (mg/L)                               | CAS_7439-92-1  | 0.01                        | -                                      | 46             | 40       | 0                                                  | 12             | 9        | 0                                                  | 3              | 3        | 0                                                  |
| Mercúrio (mg/L)                           | Mercury (mg/L)                            | CAS_7439-97-6  | 0.001                       | -                                      | 31             | 30       | 0                                                  | 12             | 12       | 0                                                  | 0              | 0        | 0                                                  |
| Cloreto (mg/L)                            | Chloride (mg/L)                           | CAS_16887-00-6 | 250                         | -                                      | 199            | 0        | 0                                                  | 129            | 0        | 0                                                  | 8              | 0        | 0                                                  |
| Sulfato (mg/L)                            | Sulphate (mg/L)                           | CAS_151-21-3   | 250                         | -                                      | 11             | 0        | 0                                                  | 8              | 0        | 0                                                  | 0              | 0        | 0                                                  |
| Tricloroetileno (µg/L)                    | Trichloroethene (µg/L)                    | CAS_79-01-6    | Σ =10                       | -                                      | 2              | 2        | 0                                                  | 1              | 1        | 0                                                  | 2              | 2        | 0                                                  |
| Tetracloroetileno (µg/L)                  | Tetrachloroethene (µg/L)                  | CAS_127-18-4   |                             | -                                      | 2              | 2        |                                                    | 1              | 1        |                                                    | 2              | 2        |                                                    |
| Nitrato (mg/L)                            | Nitrate (mg/L)                            | CAS_14797-55-8 | -                           | 50                                     | 223            | 105      | 0                                                  | 141            | 50       | 0                                                  | 19             | 3        | 0                                                  |
| Pesticidas (substância individual) (µg/L) | Pesticides (individual substances) (µg/L) | EEA_34-01-5    | -                           | 0.1                                    | 148            | 147      | 1                                                  | 112            | 0        | 0                                                  | 48             | 47       | 1                                                  |
| Pesticidas (total) <sup>[1]</sup> (µg/L)  | Pesticides (total) (µg/L)                 | EEA_32-02-0    | -                           | 0.5                                    | 9              | 8        | 0                                                  | 7              | 7        | 0                                                  | 2              | 1        | 0                                                  |
| Naftaleno (µg/L)                          | Napthalene ((µg/L)                        | CAS_91-20-3    | 2.4                         | -                                      | 2              | 2        | 0                                                  | 1              | 0        | 0                                                  | 0              | 0        | 0                                                  |
| Acenafteno (µg/L)                         | Acenaphthene (µg/L)                       | CAS_83-32-9    | 0.0065                      | -                                      | 0              | 0        | 0                                                  | 0              | 0        | 0                                                  | 1              | 1        | 0                                                  |
| Acenaftileno (µg/L)                       | Acenaphthylene (µg/L)                     | CAS_208-96-8   | 0.013                       | -                                      | 0              | 0        | 0                                                  | 0              | 0        | 0                                                  | 1              | 1        | 0                                                  |
| Antraceno (µg/L)                          | Anthracene (µg/L)                         | CAS_120-12-7   | 0.1                         | -                                      | 2              | 2        | 0                                                  | 1              | 1        | 0                                                  | 1              | 1        | 0                                                  |
| Fenantreno (µg/L)                         | Phenanthrene (µg/L)                       | CAS_85-01-8    | 0.0065                      | -                                      | 0              | 0        | 0                                                  | 0              | 0        | 0                                                  | 1              | 1        | 0                                                  |
| Fluoreno (µg/L)                           | Fluorene (µg/L)                           | CAS_86-73-7    | 0.0065                      | -                                      | 0              | 0        | 0                                                  | 0              | 0        | 0                                                  | 1              | 1        | 0                                                  |
| Pireno (µg/L)                             | Pyrene (µg/L)                             | CAS_129-00-0   | 0.0065                      | -                                      | 0              | 0        | 0                                                  | 0              | 0        | 0                                                  | 1              | 1        | 0                                                  |
| Fluoranteno (µg/L)                        | Flouranthene (µg/L)                       | CAS_206-44-0   | 0.1                         | -                                      | 2              | 2        | 0                                                  | 1              | 0        | 0                                                  | 3              | 2        | 0                                                  |
| Benzo[a]antraceno (µg/L)                  | Benzo[a]anthracene (µg/L)                 | CAS_56-55-3    | 0.0065                      | -                                      | 0              | 0        | 0                                                  | 0              | 0        | 0                                                  | 1              | 1        | 0                                                  |
| Criseno (µg/L)                            | Crysene (µg/L)                            | CAS_218-01-9   | 0.0065                      | -                                      | 0              | 0        | 0                                                  | 0              | 0        | 0                                                  | 1              | 1        | 0                                                  |
| Benzo[a]pireno (µg/L)                     | Benzo[a]pyrene (µg/L)                     | CAS_50-32-8    | 0.01                        | -                                      | 2              | 2        | 0                                                  | 1              | 1        | 0                                                  | 3              | 3        | 0                                                  |
| Benzo[b]fluoranteno (µg/L)                | Benzo[b]flouranthene (µg/L)               | CAS_205-99-2   | Σ=0.1                       | -                                      | 0              | 0        | 0                                                  | 0              | 0        | 0                                                  | 1              | 1        | 0                                                  |
| Benzo[k]fluoranteno (µg/L)                | Benzo[k]flouranthene (µg/L)               | CAS_207-08-9   |                             | -                                      | 0              | 0        |                                                    | 0              | 0        |                                                    | 1              | 1        |                                                    |
| Benzo[g,h,i]perileno (µg/L)               | Benzo[g,hi]perylene (µg/L)                | CAS_191-24-2   |                             | -                                      | 0              | 0        |                                                    | 0              | 0        |                                                    | 1              | 1        |                                                    |
| Indeno[1,2,3-cd]pireno (µg/L)             | Indeno[1,2,3-cd]pyrene (µg/L)             | CAS_193-39-5   |                             | -                                      | 0              | 0        |                                                    | 0              | 0        |                                                    | 1              | 1        |                                                    |
| Dibenzo[a,h]antraceno (µg/L)              | Dibenzo[a,h]anthracene (µg/L)             | CAS_53-70-3    | 0.0065                      | -                                      | 0              | 0        | 0                                                  | 0              | 0        | 0                                                  | 1              | 1        | 0                                                  |
| Benzeno (µg/L)                            | Benzene (µg/L)                            | CAS_71-43-2    | 1                           | -                                      | 2              | 2        | 0                                                  | 1              | 1        | 0                                                  | 3              | 3        | 0                                                  |
| Etilbenzeno (µg/L)                        | Ethylebenzene (µg/L)                      | CAS_100-41-4   | 1.3                         | -                                      | 2              | 2        | 0                                                  | 1              | 1        | 0                                                  | 3              | 3        | 0                                                  |
| Tolueno (µg/L)                            | Toluene (µg/L)                            | CAS_108-88-3   | 1.3                         | -                                      | 2              | 2        | 0                                                  | 1              | 1        | 0                                                  | 3              | 3        | 0                                                  |
| Xileno (µg/L)                             | Xylen (µg/L)                              | CAS_1330-20-7  | 1.3                         | -                                      | 2              | 2        | 0                                                  | 1              | 1        | 0                                                  | 3              | 3        | 0                                                  |
| MTBE (µg/L)                               | MTBE (µg/L)                               | CAS_1634-04-4  | 0.65                        | -                                      | 8              | 7        | 0                                                  | 7              | 6        | 0                                                  | 0              | 0        | 0                                                  |

**Table S3 Surface Water Exceedances of Groundwater Threshold Values**

| Parameter (Portuguese)                    | Parameter (English)                       | CAS Number     | Threshold Values (Limiares) | Quality standards (Norma de qualidade) | 30F/51         |          |                                                    | 30F/52         |          |                                                    | 30G/08         |          |                                                    |
|-------------------------------------------|-------------------------------------------|----------------|-----------------------------|----------------------------------------|----------------|----------|----------------------------------------------------|----------------|----------|----------------------------------------------------|----------------|----------|----------------------------------------------------|
|                                           |                                           |                |                             |                                        | No. of samples | No. <LOD | No. exceeding threshold values / Quality standards | No. of samples | No. <LOD | No. exceeding threshold values / Quality standards | No. of samples | No. <LOD | No. exceeding threshold values / Quality standards |
| Azoto Amoniacal (mg/L)                    | Ammoniacal Nitrogen (mg/L)                | CAS_7664-41-7  | 0.5                         | -                                      | 20             | 19       | 0                                                  | 26             | 22       | 0                                                  | 37             | 11       | 3                                                  |
| Condutividade (µS/cm)                     | Electrical conductivity (µS/cm)           | EEA_3142-01-6  | 2500                        |                                        | 20             | 0        | 0                                                  | 26             | 0        | 0                                                  | 38             | 0        | 0                                                  |
| pH                                        | pH                                        | EEA_3152-01-0  | 5. 5-9                      |                                        | 20             | 0        | 0                                                  | 26             | 0        | 0                                                  | 38             | 0        | 0                                                  |
| Arsénio (mg/L)                            | Arsenic (mg/L)                            | CAS_7440-38-2  | 0.01                        | -                                      | 0              | 0        | 0                                                  | 12             | 11       | 0                                                  | 3              | 2        | 0                                                  |
| Cádmio (mg/L)                             | Cadmium (mg/L)                            | CAS_7440-43-9  | 0.005                       | -                                      | 0              | 0        | 0                                                  | 11             | 11       | 0                                                  | 8              | 8        | 0                                                  |
| Chumbo (mg/L)                             | Lead (mg/L)                               | CAS_7439-92-1  | 0.01                        | -                                      | 0              | 0        | 0                                                  | 12             | 12       | 0                                                  | 9              | 6        | 0                                                  |
| Mercúrio (mg/L)                           | Mercury (mg/L)                            | CAS_7439-97-6  | 0.001                       | -                                      | 0              | 0        | 0                                                  | 0              | 0        | 0                                                  | 9              | 9        | 0                                                  |
| Cloreto (mg/L)                            | Chloride (mg/L)                           | CAS_16887-00-6 | 250                         | -                                      | 5              | 0        | 0                                                  | 8              | 0        | 0                                                  | 37             | 0        | 0                                                  |
| Sulfato (mg/L)                            | Sulphate (mg/L)                           | CAS_151-21-3   | 250                         | -                                      | 0              | 0        | 0                                                  | 0              | 0        | 0                                                  | 5              | 0        | 0                                                  |
| Tricloroetileno (µg/L)                    | Trichloroethene (µg/L)                    | CAS_79-01-6    | Σ =10                       | -                                      | 0              | 0        | 0                                                  | 11             | 11       | 0                                                  | 0              | 0        | 0                                                  |
| Tetracloroetileno (µg/L)                  | Tetrachloroethene (µg/L)                  | CAS_127-18-4   |                             | -                                      | 0              | 0        |                                                    | 11             | 11       |                                                    | 0              | 0        |                                                    |
| Nitrato (mg/L)                            | Nitrate (mg/L)                            | CAS_14797-55-8 | -                           | 50                                     | 20             | 18       | 0                                                  | 26             | 6        | 0                                                  | 37             | 0        | 0                                                  |
| Pesticidas (substância individual) (µg/L) | Pesticides (individual substances) (µg/L) | EEA_34-01-5    | -                           | 0.1                                    | 0              | 0        | 0                                                  | 197            | 196      | 1                                                  | 49             | 49       | 0                                                  |
| Pesticidas (total) <sup>[1]</sup> (µg/L)  | Pesticides (total) (µg/L)                 | EEA_32-02-0    | -                           | 0.5                                    | 0              | 0        | 0                                                  | 11             | 10       | 0                                                  | 3              | 3        | 0                                                  |
| Naftaleno (µg/L)                          | Napthalene ((µg/L)                        | CAS_91-20-3    | 2.4                         | -                                      | 0              | 0        | 0                                                  | 11             | 4        | 0                                                  | 0              | 0        | 0                                                  |
| Acenafteno (µg/L)                         | Acenaphthene (µg/L)                       | CAS_83-32-9    | 0.0065                      | -                                      | 0              | 0        | 0                                                  | 0              | 0        | 0                                                  | 0              | 0        | 0                                                  |
| Acenaftileno (µg/L)                       | Acenaphthylene (µg/L)                     | CAS_208-96-8   | 0.013                       | -                                      | 0              | 0        | 0                                                  | 0              | 0        | 0                                                  | 0              | 0        | 0                                                  |
| Antraceno (µg/L)                          | Anthracene (µg/L)                         | CAS_120-12-7   | 0.1                         | -                                      | 0              | 0        | 0                                                  | 11             | 11       | 0                                                  | 0              | 0        | 0                                                  |
| Fenantreno (µg/L)                         | Phenanthrene (µg/L)                       | CAS_85-01-8    | 0.0065                      | -                                      | 0              | 0        | 0                                                  | 0              | 0        | 0                                                  | 0              | 0        | 0                                                  |
| Fluoreno (µg/L)                           | Fluorene (µg/L)                           | CAS_86-73-7    | 0.0065                      | -                                      | 0              | 0        | 0                                                  | 0              | 0        | 0                                                  | 0              | 0        | 0                                                  |
| Pireno (µg/L)                             | Pyrene (µg/L)                             | CAS_129-00-0   | 0.0065                      | -                                      | 0              | 0        | 0                                                  | 0              | 0        | 0                                                  | 0              | 0        | 0                                                  |
| Fluoranteno (µg/L)                        | Flouranthene (µg/L)                       | CAS_206-44-0   | 0.1                         | -                                      | 0              | 0        | 0                                                  | 11             | 10       | 0                                                  | 0              | 0        | 0                                                  |
| Benzo[a]antraceno (µg/L)                  | Benzo[a]anthracene (µg/L)                 | CAS_56-55-3    | 0.0065                      | -                                      | 0              | 0        | 0                                                  | 0              | 0        | 0                                                  | 0              | 0        | 0                                                  |
| Criseno (µg/L)                            | Crysene (µg/L)                            | CAS_218-01-9   | 0.0065                      | -                                      | 0              | 0        | 0                                                  | 0              | 0        | 0                                                  | 0              | 0        | 0                                                  |
| Benzo[a]pireno (µg/L)                     | Benzo[a]pyrene (µg/L)                     | CAS_50-32-8    | 0.01                        | -                                      | 0              | 0        | 0                                                  | 6              | 6        | 0                                                  | 0              | 0        | 0                                                  |
| Benzo[b]fluoranteno (µg/L)                | Benzo[b]flouranthene (µg/L)               | CAS_205-99-2   | Σ=0.1                       | -                                      | 0              | 0        | 0                                                  | 0              | 0        | 0                                                  | 0              | 0        | 0                                                  |
| Benzo[k]fluoranteno (µg/L)                | Benzo[k]flouranthene (µg/L)               | CAS_207-08-9   |                             | -                                      | 0              | 0        |                                                    | 0              | 0        |                                                    | 0              | 0        |                                                    |
| Benzo[g,h,i]perileno (µg/L)               | Benzo[g,hi]perylene (µg/L)                | CAS_191-24-2   |                             | -                                      | 0              | 0        |                                                    | 0              | 0        |                                                    | 0              | 0        |                                                    |
| Indeno[1,2,3-cd]pireno (µg/L)             | Indeno[1,2,3-cd]pyrene (µg/L)             | CAS_193-39-5   |                             | -                                      | 0              | 0        |                                                    | 0              | 0        |                                                    | 0              | 0        |                                                    |
| Dibenzo[a,h]antraceno (µg/L)              | Dibenzo[a,h]anthracene (µg/L)             | CAS_53-70-3    | 0.0065                      | -                                      | 0              | 0        | 0                                                  | 0              | 0        | 0                                                  | 0              | 0        | 0                                                  |
| Benzeno (µg/L)                            | Benzene (µg/L)                            | CAS_71-43-2    | 1                           | -                                      | 0              | 0        | 0                                                  | 11             | 11       | 0                                                  | 0              | 0        | 0                                                  |
| Etilbenzeno (µg/L)                        | Ethylebenzene (µg/L)                      | CAS_100-41-4   | 1.3                         | -                                      | 0              | 0        | 0                                                  | 11             | 11       | 0                                                  | 0              | 0        | 0                                                  |
| Tolueno (µg/L)                            | Toluene (µg/L)                            | CAS_108-88-3   | 1.3                         | -                                      | 0              | 0        | 0                                                  | 10             | 10       | 0                                                  | 0              | 0        | 0                                                  |
| Xileno (µg/L)                             | Xylen (µg/L)                              | CAS_1330-20-7  | 1.3                         | -                                      | 0              | 0        | 0                                                  | 11             | 10       | 1                                                  | 0              | 0        | 0                                                  |
| MTBE (µg/L)                               | MTBE (µg/L)                               | CAS_1634-04-4  | 0.65                        | -                                      | 0              | 0        | 0                                                  | 0              | 0        | 0                                                  | 3              | 0        | 0                                                  |

Table S3 Surface Water Exceedances of Groundwater Threshold Values

| Parameter (Portuguese)                    | Parameter (English)                       | CAS Number     | Threshold Values (Limiares) | Quality standards (Norma de qualidade) | 30K/51         |          |                                                    | 31E/01         |          |                                                    | 31H/02         |          |                                                    |
|-------------------------------------------|-------------------------------------------|----------------|-----------------------------|----------------------------------------|----------------|----------|----------------------------------------------------|----------------|----------|----------------------------------------------------|----------------|----------|----------------------------------------------------|
|                                           |                                           |                |                             |                                        | No. of samples | No. <LOD | No. exceeding threshold values / Quality standards | No. of samples | No. <LOD | No. exceeding threshold values / Quality standards | No. of samples | No. <LOD | No. exceeding threshold values / Quality standards |
| Azoto Amoniacal (mg/L)                    | Ammoniacal Nitrogen (mg/L)                | CAS_7664-41-7  | 0.5                         | -                                      | 17             | 17       | 0                                                  | 110            | 61       | 21                                                 | 188            | 126      | 0                                                  |
| Condutividade (µS/cm)                     | Electrical conductivity (µS/cm)           | EEA_3142-01-6  | 2500                        |                                        | 17             | 0        | 0                                                  | 111            | 0        | 0                                                  | 190            | 0        | 0                                                  |
| pH                                        | pH                                        | EEA_3152-01-0  | 5. 5-9                      |                                        | 17             | 0        | 0                                                  | 111            | 0        | 0                                                  | 190            | 0        | 1                                                  |
| Arsénio (mg/L)                            | Arsenic (mg/L)                            | CAS_7440-38-2  | 0.01                        | -                                      | 1              | 1        | 0                                                  | 27             | 21       | 0                                                  | 17             | 17       | 0                                                  |
| Cádmio (mg/L)                             | Cadmium (mg/L)                            | CAS_7440-43-9  | 0.005                       | -                                      | 7              | 7        | 0                                                  | 42             | 38       | 0                                                  | 39             | 38       | 0                                                  |
| Chumbo (mg/L)                             | Lead (mg/L)                               | CAS_7439-92-1  | 0.01                        | -                                      | 8              | 8        | 0                                                  | 44             | 39       | 0                                                  | 44             | 36       | 1                                                  |
| Mercúrio (mg/L)                           | Mercury (mg/L)                            | CAS_7439-97-6  | 0.001                       | -                                      | 2              | 1        | 0                                                  | 37             | 37       | 0                                                  | 31             | 29       | 0                                                  |
| Cloreto (mg/L)                            | Chloride (mg/L)                           | CAS_16887-00-6 | 250                         | -                                      | 5              | 0        | 0                                                  | 96             | 0        | 6                                                  | 168            | 0        | 0                                                  |
| Sulfato (mg/L)                            | Sulphate (mg/L)                           | CAS_151-21-3   | 250                         | -                                      | 0              | 0        | 0                                                  | 9              | 0        | 0                                                  | 9              | 0        | 0                                                  |
| Tricloroetileno (µg/L)                    | Trichloroethene (µg/L)                    | CAS_79-01-6    | Σ =10                       | -                                      | 1              | 1        | 0                                                  | 14             | 14       | 0                                                  | 13             | 13       | 0                                                  |
| Tetracloroetileno (µg/L)                  | Tetrachloroethene (µg/L)                  | CAS_127-18-4   |                             | -                                      | 1              | 1        |                                                    | 10             | 10       |                                                    | 13             | 13       |                                                    |
| Nitrato (mg/L)                            | Nitrate (mg/L)                            | CAS_14797-55-8 | -                           | 50                                     | 17             | 15       | 0                                                  | 111            | 9        | 0                                                  | 189            | 1        | 0                                                  |
| Pesticidas (substância individual) (µg/L) | Pesticides (individual substances) (µg/L) | EEA_34-01-5    | -                           | 0.1                                    | 102            | 100      | 1                                                  | 842            | 805      | 28                                                 | 299            | 299      | 0                                                  |
| Pesticidas (total) <sup>[1]</sup> (µg/L)  | Pesticides (total) (µg/L)                 | EEA_32-02-0    | -                           | 0.5                                    | 5              | 3        | 0                                                  | 26             | 7        | 12                                                 | 18             | 18       | 0                                                  |
| Naftaleno (µg/L)                          | Napthalene ((µg/L)                        | CAS_91-20-3    | 2.4                         | -                                      | 1              | 1        | 0                                                  | 22             | 13       | 0                                                  | 16             | 4        | 0                                                  |
| Acenafteno (µg/L)                         | Acenaphthene (µg/L)                       | CAS_83-32-9    | 0.0065                      | -                                      | 0              | 0        | 0                                                  | 0              | 0        | 0                                                  | 2              | 2        | 0                                                  |
| Acenaftileno (µg/L)                       | Acenaphthylene (µg/L)                     | CAS_208-96-8   | 0.013                       | -                                      | 0              | 0        | 0                                                  | 0              | 0        | 0                                                  | 2              | 2        | 0                                                  |
| Antraceno (µg/L)                          | Anthracene (µg/L)                         | CAS_120-12-7   | 0.1                         | -                                      | 1              | 1        | 0                                                  | 23             | 22       | 0                                                  | 16             | 16       | 0                                                  |
| Fenantreno (µg/L)                         | Phenanthrene (µg/L)                       | CAS_85-01-8    | 0.0065                      | -                                      | 0              | 0        | 0                                                  | 0              | 0        | 0                                                  | 2              | 0        | 1                                                  |
| Fluoreno (µg/L)                           | Fluorene (µg/L)                           | CAS_86-73-7    | 0.0065                      | -                                      | 0              | 0        | 0                                                  | 0              | 0        | 0                                                  | 2              | 2        | 0                                                  |
| Pireno (µg/L)                             | Pyrene (µg/L)                             | CAS_129-00-0   | 0.0065                      | -                                      | 0              | 0        | 0                                                  | 1              | 1        | 0                                                  | 2              | 1        | 0                                                  |
| Fluoranteno (µg/L)                        | Flouranthene (µg/L)                       | CAS_206-44-0   | 0.1                         | -                                      | 1              | 1        | 0                                                  | 23             | 18       | 0                                                  | 17             | 17       | 0                                                  |
| Benzo[a]antraceno (µg/L)                  | Benzo[a]anthracene (µg/L)                 | CAS_56-55-3    | 0.0065                      | -                                      | 0              | 0        | 0                                                  | 1              | 1        | 0                                                  | 2              | 2        | 0                                                  |
| Criseno (µg/L)                            | Crysene (µg/L)                            | CAS_218-01-9   | 0.0065                      | -                                      | 0              | 0        | 0                                                  | 1              | 1        | 0                                                  | 2              | 2        | 0                                                  |
| Benzo[a]pireno (µg/L)                     | Benzo[a]pyrene (µg/L)                     | CAS_50-32-8    | 0.01                        | -                                      | 1              | 1        | 0                                                  | 23             | 23       | 0                                                  | 9              | 9        | 0                                                  |
| Benzo[b]fluoranteno (µg/L)                | Benzo[b]flouranthene (µg/L)               | CAS_205-99-2   | Σ=0.1                       | -                                      | 0              | 0        | 0                                                  | 21             | 21       | 0                                                  | 4              | 4        | 0                                                  |
| Benzo[k]fluoranteno (µg/L)                | Benzo[k]flouranthene (µg/L)               | CAS_207-08-9   |                             | -                                      | 0              | 0        |                                                    | 21             | 21       |                                                    | 4              | 4        |                                                    |
| Benzo[g,h,i]perileno (µg/L)               | Benzo[g,hi]perylene (µg/L)                | CAS_191-24-2   |                             | -                                      | 0              | 0        |                                                    | 20             | 20       |                                                    | 4              | 4        |                                                    |
| Indeno[1,2,3-cd]pireno (µg/L)             | Indeno[1,2,3-cd]pyrene (µg/L)             | CAS_193-39-5   |                             | -                                      | 0              | 0        |                                                    | 21             | 21       |                                                    | 4              | 4        |                                                    |
| Dibenzo[a,h]antraceno (µg/L)              | Dibenzo[a,h]anthracene (µg/L)             | CAS_53-70-3    | 0.0065                      | -                                      | 0              | 0        | 0                                                  | 1              | 1        | 0                                                  | 2              | 2        | 0                                                  |
| Benzeno (µg/L)                            | Benzene (µg/L)                            | CAS_71-43-2    | 1                           | -                                      | 1              | 1        | 0                                                  | 19             | 19       | 0                                                  | 13             | 13       | 0                                                  |
| Etilbenzeno (µg/L)                        | Ethylebenzene (µg/L)                      | CAS_100-41-4   | 1.3                         | -                                      | 1              | 1        | 0                                                  | 11             | 11       | 0                                                  | 13             | 13       | 0                                                  |
| Tolueno (µg/L)                            | Toluene (µg/L)                            | CAS_108-88-3   | 1.3                         | -                                      | 1              | 1        | 0                                                  | 19             | 19       | 0                                                  | 11             | 11       | 0                                                  |
| Xileno (µg/L)                             | Xylen (µg/L)                              | CAS_1330-20-7  | 1.3                         | -                                      | 1              | 1        | 0                                                  | 2              | 2        | 0                                                  | 13             | 13       | 0                                                  |
| MTBE (µg/L)                               | MTBE (µg/L)                               | CAS_1634-04-4  | 0.65                        | -                                      | 0              | 0        | 0                                                  | 5              | 3        | 0                                                  | 7              | 4        | 0                                                  |

Table S3 Surface Water Exceedances of Groundwater Threshold Values

| Parameter (Portuguese)                    | Parameter (English)                       | CAS Number     | Threshold Values (Limiares) | Quality standards (Norma de qualidade) | 31I/01         |          |                                                    | 31J/01         |          |                                                    | 31K/03         |          |                                                    |
|-------------------------------------------|-------------------------------------------|----------------|-----------------------------|----------------------------------------|----------------|----------|----------------------------------------------------|----------------|----------|----------------------------------------------------|----------------|----------|----------------------------------------------------|
|                                           |                                           |                |                             |                                        | No. of samples | No. <LOD | No. exceeding threshold values / Quality standards | No. of samples | No. <LOD | No. exceeding threshold values / Quality standards | No. of samples | No. <LOD | No. exceeding threshold values / Quality standards |
| Azoto Amoniacal (mg/L)                    | Ammoniacal Nitrogen (mg/L)                | CAS_7664-41-7  | 0.5                         | -                                      | 1              | 1        | 0                                                  | 60             | 44       | 5                                                  | 116            | 88       | 0                                                  |
| Condutividade (µS/cm)                     | Electrical conductivity (µS/cm)           | EEA_3142-01-6  | 2500                        |                                        | 1              | 0        | 0                                                  | 60             | 0        | 0                                                  | 116            | 0        | 0                                                  |
| pH                                        | pH                                        | EEA_3152-01-0  | 5. 5-9                      |                                        | 1              | 0        | 0                                                  | 60             | 0        | 0                                                  | 117            | 0        | 0                                                  |
| Arsénio (mg/L)                            | Arsenic (mg/L)                            | CAS_7440-38-2  | 0.01                        | -                                      | 1              | 1        | 0                                                  | 5              | 4        | 0                                                  | 6              | 6        | 0                                                  |
| Cádmio (mg/L)                             | Cadmium (mg/L)                            | CAS_7440-43-9  | 0.005                       | -                                      | 1              | 0        | 0                                                  | 15             | 15       | 0                                                  | 20             | 17       | 0                                                  |
| Chumbo (mg/L)                             | Lead (mg/L)                               | CAS_7439-92-1  | 0.01                        | -                                      | 1              | 1        | 0                                                  | 16             | 15       | 0                                                  | 23             | 19       | 0                                                  |
| Mercúrio (mg/L)                           | Mercury (mg/L)                            | CAS_7439-97-6  | 0.001                       | -                                      | 0              | 0        | 0                                                  | 13             | 13       | 0                                                  | 19             | 18       | 0                                                  |
| Cloreto (mg/L)                            | Chloride (mg/L)                           | CAS_16887-00-6 | 250                         | -                                      | 0              | 0        | 0                                                  | 55             | 0        | 0                                                  | 107            | 0        | 0                                                  |
| Sulfato (mg/L)                            | Sulphate (mg/L)                           | CAS_151-21-3   | 250                         | -                                      | 0              | 0        | 0                                                  | 7              | 0        | 0                                                  | 5              | 0        | 0                                                  |
| Tricloroetileno (µg/L)                    | Trichloroethene (µg/L)                    | CAS_79-01-6    | Σ =10                       | -                                      | 1              | 1        | 0                                                  | 0              | 0        | 0                                                  | 0              | 0        | 0                                                  |
| Tetracloroetileno (µg/L)                  | Tetrachloroethene (µg/L)                  | CAS_127-18-4   |                             | -                                      | 1              | 1        |                                                    | 0              | 0        |                                                    | 0              | 0        |                                                    |
| Nitrato (mg/L)                            | Nitrate (mg/L)                            | CAS_14797-55-8 | -                           | 50                                     | 1              | 0        | 0                                                  | 60             | 5        | 0                                                  | 116            | 72       | 0                                                  |
| Pesticidas (substância individual) (µg/L) | Pesticides (individual substances) (µg/L) | EEA_34-01-5    | -                           | 0.1                                    | 8              | 8        | 0                                                  | 61             | 61       | 0                                                  | 74             | 74       | 0                                                  |
| Pesticidas (total) <sup>[1]</sup> (µg/L)  | Pesticides (total) (µg/L)                 | EEA_32-02-0    | -                           | 0.5                                    | 1              | 1        | 0                                                  | 4              | 4        | 0                                                  | 5              | 5        | 0                                                  |
| Naftaleno (µg/L)                          | Napthalene ((µg/L)                        | CAS_91-20-3    | 2.4                         | -                                      | 1              | 0        | 0                                                  | 0              | 0        | 0                                                  | 0              | 0        | 0                                                  |
| Acenafteno (µg/L)                         | Acenaphthene (µg/L)                       | CAS_83-32-9    | 0.0065                      | -                                      | 0              | 0        | 0                                                  | 0              | 0        | 0                                                  | 0              | 0        | 0                                                  |
| Acenaftileno (µg/L)                       | Acenaphthylene (µg/L)                     | CAS_208-96-8   | 0.013                       | -                                      | 0              | 0        | 0                                                  | 0              | 0        | 0                                                  | 0              | 0        | 0                                                  |
| Antraceno (µg/L)                          | Anthracene (µg/L)                         | CAS_120-12-7   | 0.1                         | -                                      | 1              | 1        | 0                                                  | 0              | 0        | 0                                                  | 0              | 0        | 0                                                  |
| Fenantreno (µg/L)                         | Phenanthrene (µg/L)                       | CAS_85-01-8    | 0.0065                      | -                                      | 0              | 0        | 0                                                  | 0              | 0        | 0                                                  | 0              | 0        | 0                                                  |
| Fluoreno (µg/L)                           | Fluorene (µg/L)                           | CAS_86-73-7    | 0.0065                      | -                                      | 0              | 0        | 0                                                  | 0              | 0        | 0                                                  | 0              | 0        | 0                                                  |
| Pireno (µg/L)                             | Pyrene (µg/L)                             | CAS_129-00-0   | 0.0065                      | -                                      | 0              | 0        | 0                                                  | 0              | 0        | 0                                                  | 0              | 0        | 0                                                  |
| Fluoranteno (µg/L)                        | Flouranthene (µg/L)                       | CAS_206-44-0   | 0.1                         | -                                      | 1              | 1        | 0                                                  | 0              | 0        | 0                                                  | 0              | 0        | 0                                                  |
| Benzo[a]antraceno (µg/L)                  | Benzo[a]anthracene (µg/L)                 | CAS_56-55-3    | 0.0065                      | -                                      | 0              | 0        | 0                                                  | 0              | 0        | 0                                                  | 0              | 0        | 0                                                  |
| Criseno (µg/L)                            | Crysene (µg/L)                            | CAS_218-01-9   | 0.0065                      | -                                      | 0              | 0        | 0                                                  | 0              | 0        | 0                                                  | 0              | 0        | 0                                                  |
| Benzo[a]pireno (µg/L)                     | Benzo[a]pyrene (µg/L)                     | CAS_50-32-8    | 0.01                        | -                                      | 0              | 0        | 0                                                  | 0              | 0        | 0                                                  | 0              | 0        | 0                                                  |
| Benzo[b]fluoranteno (µg/L)                | Benzo[b]flouranthene (µg/L)               | CAS_205-99-2   | Σ=0.1                       | -                                      | 0              | 0        | 0                                                  | 0              | 0        | 0                                                  | 0              | 0        | 0                                                  |
| Benzo[k]fluoranteno (µg/L)                | Benzo[k]flouranthene (µg/L)               | CAS_207-08-9   |                             | -                                      | 0              | 0        |                                                    | 0              | 0        |                                                    | 0              | 0        |                                                    |
| Benzo[g,h,i]perileno (µg/L)               | Benzo[g,hi]perylene (µg/L)                | CAS_191-24-2   |                             | -                                      | 0              | 0        |                                                    | 0              | 0        |                                                    | 0              | 0        |                                                    |
| Indeno[1,2,3-cd]pireno (µg/L)             | Indeno[1,2,3-cd]pyrene (µg/L)             | CAS_193-39-5   |                             | -                                      | 0              | 0        |                                                    | 0              | 0        |                                                    | 0              | 0        |                                                    |
| Dibenzo[a,h]antraceno (µg/L)              | Dibenzo[a,h]anthracene (µg/L)             | CAS_53-70-3    | 0.0065                      | -                                      | 0              | 0        | 0                                                  | 0              | 0        | 0                                                  | 0              | 0        | 0                                                  |
| Benzeno (µg/L)                            | Benzene (µg/L)                            | CAS_71-43-2    | 1                           | -                                      | 1              | 1        | 0                                                  | 0              | 0        | 0                                                  | 0              | 0        | 0                                                  |
| Etilbenzeno (µg/L)                        | Ethylebenzene (µg/L)                      | CAS_100-41-4   | 1.3                         | -                                      | 1              | 1        | 0                                                  | 0              | 0        | 0                                                  | 0              | 0        | 0                                                  |
| Tolueno (µg/L)                            | Toluene (µg/L)                            | CAS_108-88-3   | 1.3                         | -                                      | 0              | 0        | 0                                                  | 0              | 0        | 0                                                  | 0              | 0        | 0                                                  |
| Xileno (µg/L)                             | Xyelen (µg/L)                             | CAS_1330-20-7  | 1.3                         | -                                      | 1              | 1        | 0                                                  | 0              | 0        | 0                                                  | 0              | 0        | 0                                                  |
| MTBE (µg/L)                               | MTBE (µg/L)                               | CAS_1634-04-4  | 0.65                        | -                                      | 0              | 0        | 0                                                  | 3              | 1        | 0                                                  | 6              | 6        | 0                                                  |

Table S3 Surface Water Exceedances of Groundwater Threshold Values

| Parameter (Portuguese)                    | Parameter (English)                       | CAS Number     | Threshold Values (Limiares) | Quality standards (Norma de qualidade) | 31K/50         |          |                                                    | 31L/50         |          |                                                    |
|-------------------------------------------|-------------------------------------------|----------------|-----------------------------|----------------------------------------|----------------|----------|----------------------------------------------------|----------------|----------|----------------------------------------------------|
|                                           |                                           |                |                             |                                        | No. of samples | No. <LOD | No. exceeding threshold values / Quality standards | No. of samples | No. <LOD | No. exceeding threshold values / Quality standards |
| Azoto Amoniacal (mg/L)                    | Ammoniacal Nitrogen (mg/L)                | CAS_7664-41-7  | 0.5                         | -                                      | 9              | 9        | 0                                                  | 15             | 15       | 0                                                  |
| Condutividade (µS/cm)                     | Electrical conductivity (µS/cm)           | EEA_3142-01-6  | 2500                        |                                        | 9              | 0        | 0                                                  | 15             | 0        | 0                                                  |
| pH                                        | pH                                        | EEA_3152-01-0  | 5. 5-9                      |                                        | 9              | 0        | 0                                                  | 15             | 0        | 0                                                  |
| Arsénio (mg/L)                            | Arsenic (mg/L)                            | CAS_7440-38-2  | 0.01                        | -                                      | 1              | 0        | 0                                                  | 0              | 0        | 0                                                  |
| Cádmio (mg/L)                             | Cadmium (mg/L)                            | CAS_7440-43-9  | 0.005                       | -                                      | 3              | 2        | 0                                                  | 2              | 2        | 0                                                  |
| Chumbo (mg/L)                             | Lead (mg/L)                               | CAS_7439-92-1  | 0.01                        | -                                      | 3              | 3        | 0                                                  | 3              | 3        | 0                                                  |
| Mercúrio (mg/L)                           | Mercury (mg/L)                            | CAS_7439-97-6  | 0.001                       | -                                      | 0              | 0        | 0                                                  | 0              | 0        | 0                                                  |
| Cloreto (mg/L)                            | Chloride (mg/L)                           | CAS_16887-00-6 | 250                         | -                                      | 5              | 0        | 0                                                  | 3              | 0        | 0                                                  |
| Sulfato (mg/L)                            | Sulphate (mg/L)                           | CAS_151-21-3   | 250                         | -                                      | 0              | 0        | 0                                                  | 0              | 0        | 0                                                  |
| Tricloroetileno (µg/L)                    | Trichloroethene (µg/L)                    | CAS_79-01-6    | Σ =10                       | -                                      | 2              | 2        | 0                                                  | 0              | 0        | 0                                                  |
| Tetracloroetileno (µg/L)                  | Tetrachloroethene (µg/L)                  | CAS_127-18-4   |                             | -                                      | 2              | 2        |                                                    | 0              | 0        |                                                    |
| Nitrato (mg/L)                            | Nitrate (mg/L)                            | CAS_14797-55-8 | -                           | 50                                     | 9              | 0        | 0                                                  | 15             | 14       | 0                                                  |
| Pesticidas (substância individual) (µg/L) | Pesticides (individual substances) (µg/L) | EEA_34-01-5    | -                           | 0.1                                    | 53             | 0        | 0                                                  | 0              | 0        | 0                                                  |
| Pesticidas (total) <sup>[1]</sup> (µg/L)  | Pesticides (total) (µg/L)                 | EEA_32-02-0    | -                           | 0.5                                    | 3              | 3        | 0                                                  | 0              | 0        | 0                                                  |
| Naftaleno (µg/L)                          | Napthalene ((µg/L)                        | CAS_91-20-3    | 2.4                         | -                                      | 0              | 0        | 0                                                  | 0              | 0        | 0                                                  |
| Acenafteno (µg/L)                         | Acenaphthene (µg/L)                       | CAS_83-32-9    | 0.0065                      | -                                      | 0              | 0        | 0                                                  | 0              | 0        | 0                                                  |
| Acenaftileno (µg/L)                       | Acenaphthylene (µg/L)                     | CAS_208-96-8   | 0.013                       | -                                      | 0              | 0        | 0                                                  | 0              | 0        | 0                                                  |
| Antraceno (µg/L)                          | Anthracene (µg/L)                         | CAS_120-12-7   | 0.1                         | -                                      | 0              | 0        | 0                                                  | 0              | 0        | 0                                                  |
| Fenantreno (µg/L)                         | Phenanthrene (µg/L)                       | CAS_85-01-8    | 0.0065                      | -                                      | 0              | 0        | 0                                                  | 0              | 0        | 0                                                  |
| Fluoreno (µg/L)                           | Fluorene (µg/L)                           | CAS_86-73-7    | 0.0065                      | -                                      | 0              | 0        | 0                                                  | 0              | 0        | 0                                                  |
| Pireno (µg/L)                             | Pyrene (µg/L)                             | CAS_129-00-0   | 0.0065                      | -                                      | 0              | 0        | 0                                                  | 0              | 0        | 0                                                  |
| Fluoranteno (µg/L)                        | Flouranthene (µg/L)                       | CAS_206-44-0   | 0.1                         | -                                      | 0              | 0        | 0                                                  | 0              | 0        | 0                                                  |
| Benzo[a]antraceno (µg/L)                  | Benzo[a]anthracene (µg/L)                 | CAS_56-55-3    | 0.0065                      | -                                      | 0              | 0        | 0                                                  | 0              | 0        | 0                                                  |
| Criseno (µg/L)                            | Crysene (µg/L)                            | CAS_218-01-9   | 0.0065                      | -                                      | 0              | 0        | 0                                                  | 0              | 0        | 0                                                  |
| Benzo[a]pireno (µg/L)                     | Benzo[a]pyrene (µg/L)                     | CAS_50-32-8    | 0.01                        | -                                      | 0              | 0        | 0                                                  | 0              | 0        | 0                                                  |
| Benzo[b]fluoranteno (µg/L)                | Benzo[b]flouranthene (µg/L)               | CAS_205-99-2   | Σ=0.1                       | -                                      | 0              | 0        | 0                                                  | 0              | 0        | 0                                                  |
| Benzo[k]fluoranteno (µg/L)                | Benzo[k]flouranthene (µg/L)               | CAS_207-08-9   |                             | -                                      | 0              | 0        |                                                    | 0              | 0        |                                                    |
| Benzo[g,h,i]perileno (µg/L)               | Benzo[g,hi]perylene (µg/L)                | CAS_191-24-2   |                             | -                                      | 0              | 0        |                                                    | 0              | 0        |                                                    |
| Indeno[1,2,3-cd]pireno (µg/L)             | Indeno[1,2,3-cd]pyrene (µg/L)             | CAS_193-39-5   |                             | -                                      | 0              | 0        |                                                    | 0              | 0        |                                                    |
| Dibenzo[a,h]antraceno (µg/L)              | Dibenzo[a,h]anthracene (µg/L)             | CAS_53-70-3    | 0.0065                      | -                                      | 0              | 0        | 0                                                  | 0              | 0        | 0                                                  |
| Benzeno (µg/L)                            | Benzene (µg/L)                            | CAS_71-43-2    | 1                           | -                                      | 2              | 2        | 0                                                  | 0              | 0        | 0                                                  |
| Etilbenzeno (µg/L)                        | Ethylebenzene (µg/L)                      | CAS_100-41-4   | 1.3                         | -                                      | 2              | 2        | 0                                                  | 0              | 0        | 0                                                  |
| Tolueno (µg/L)                            | Toluene (µg/L)                            | CAS_108-88-3   | 1.3                         | -                                      | 2              | 2        | 0                                                  | 0              | 0        | 0                                                  |
| Xileno (µg/L)                             | Xyelen (µg/L)                             | CAS_1330-20-7  | 1.3                         | -                                      | 2              | 2        | 0                                                  | 0              | 0        | 0                                                  |
| MTBE (µg/L)                               | MTBE (µg/L)                               | CAS_1634-04-4  | 0.65                        | -                                      | 0              | 0        | 0                                                  | 0              | 0        | 0                                                  |
